# Supplementary material for: A single-crystalline Co3O4 nanoparticle-assembled three-dimensional chain as an ultra-stable magnesium-ion battery cathode at different temperatures
Source: Royal Society of Chemistry journal article supplement (doi:10.1039/d3dt01077e), 2023-01-01
Supplement: d3dt01077e1.pdf [file d3dt01077e1.pdf]

Electronic Supplementary Information (ESI) for Chemical Communications. This journal is (c) The Royal Society of Chemistry 2023.

Electronic Supplementary Information (ESI)

**A single-crystalline Co<sub>3</sub>O<sub>4</sub> nanoparticles-assembled three-dimensional chain as ultra-stable magnesium-ion battery cathode under different temperatures**

Qian Ding<sup>a</sup>, Tianli Han<sup>a</sup>, Xirong Lin<sup>b</sup>, Ting Zhou,<sup>a</sup> Jinyun Liu<sup>\*a</sup> and Huigang Zhang<sup>\*c</sup>

## **Experimental**

### **Synthesis of Co<sub>3</sub>O<sub>4</sub>**

All chemicals were used directly without further purification and were purchased from Aladdin. Ultrapure water was used in all synthesis processes. The 3D hierarchical Co<sub>3</sub>O<sub>4</sub> was synthesized by a hydrothermal method. In a typical process, 1.76 g Co(CH<sub>3</sub>COO)<sub>2</sub>·4H<sub>2</sub>O, 3.0 g CO(NH<sub>2</sub>)<sub>2</sub> and 5 g dimethyl diallyl ammonium chloride were dissolved in 55 mL ultrapure water at room temperature. After stirring for 5 min, a uniform pink solution was obtained. The mixed solution was transferred to a 50 mL Teflon-lined high-pressure reactor and heated at 120 °C for 12 h. After reaction, it was cooled to room temperature, and the sample was collected, washed by alternating centrifugation with water and ethanol, and dried at 80 °C overnight. Finally, the sample was calcined in an air atmosphere at 450 °C for 2 h by using a ramp rate of 5 °C min<sup>-1</sup>.

### **Characterization**

The samples were characterized by scanning electron microscopy (SEM, Hitachi S-4800) and transmission electron microscopy (TEM, HT-7700). X-ray photoelectron

spectroscopy (XPS, ESCALAB 250Xi) was used to analyze the composition, and X-ray diffraction (XRD, Bruker D8 Advance) was used to study the crystalline structure. The lattice spacing was studied on high-resolution TEM (HRTEM). Energy dispersive X-ray spectroscopy (EDS), and elemental mapping was employed for measuring elemental distribution. The surface area and pore-size distribution were measured by using Micrometrics ASAP 2460 analyzer.

### **Electrochemical tests**

Electrochemical performance was investigated by using a 2032-typed button cell system. The active material (60 wt%), conductive carbon black (30 wt%) and polyvinylidene fluoride (PVDF, 10 wt%) were evenly mixed and dispersed in n-methylpyrrolidone (NMP, 6.54 wt %). Then, the uniform black slurry was evenly coated on the carbon paper carbon paper collector by scraping method, dried in vacuum for 12 h, and cut into discs with a diameter of 12 mm. The 0.4 M  $(\text{PhMgCl})_2\text{-AlCl}_3/\text{THF}$  was used as electrolyte. The Cycling experiments were tested on a battery tester (NEWARE, CT-4008), and cyclic voltammetry (CV) and electrochemical impedance spectroscopy (EIS) were performed on an electrochemical workstation (CHI-660E).

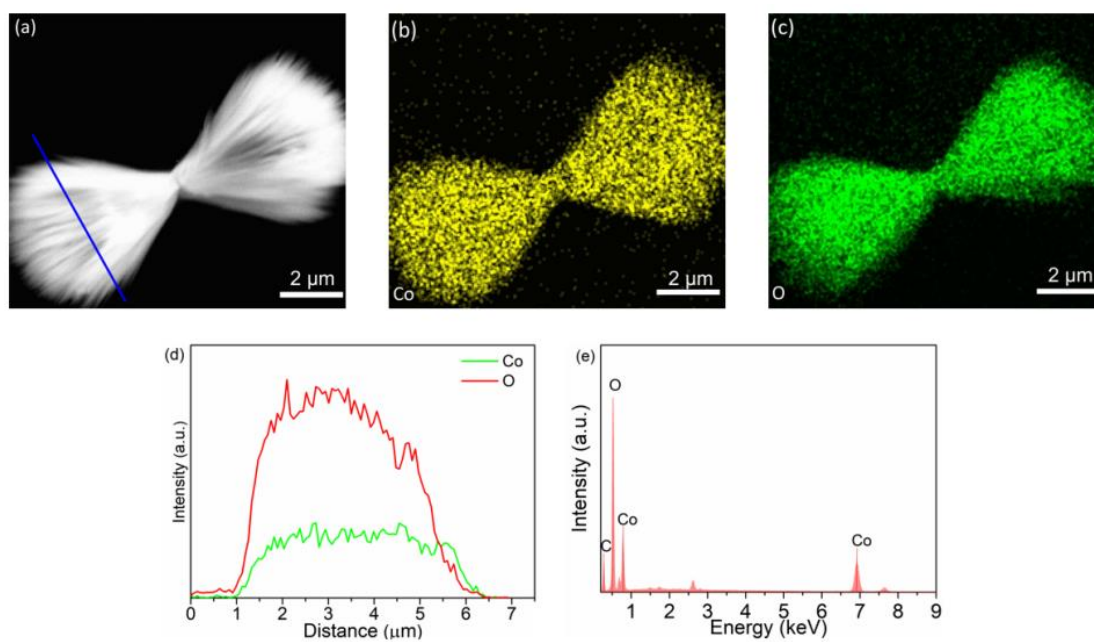

**Fig. S1** (a) SEM and (b-c) mapping images of  $\text{Co}_3\text{O}_4$ . The line on (a) indicates the scanning path. (d) line-scanning curves and (e) EDS spectrum.

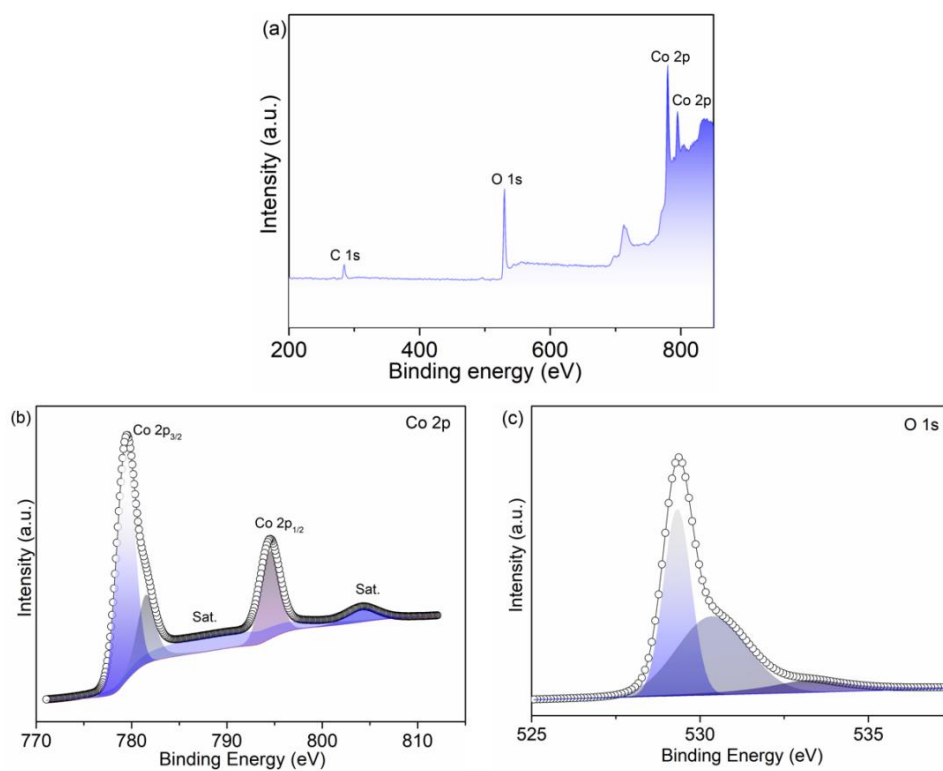

**Fig. S2** XPS spectra of  $\text{Co}_3\text{O}_4$ : (a) survey spectrum, (b) Co 2p and (c) O 1s.

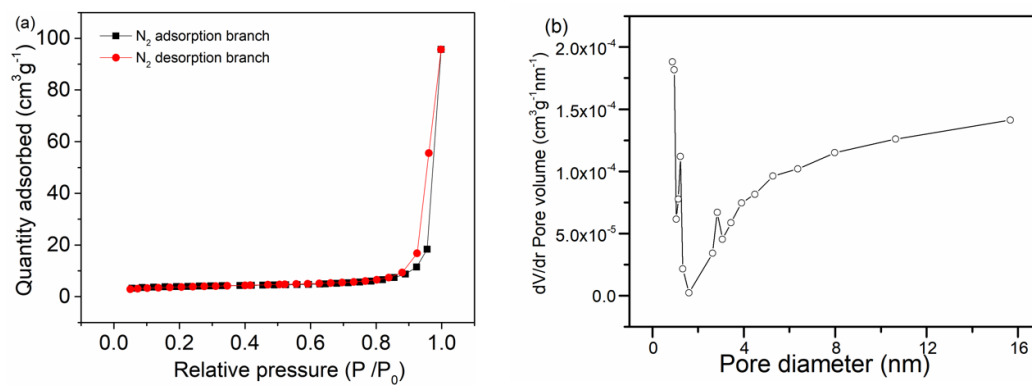

**Fig. S3** (a) Adsorption-desorption isotherm and (b) pore-size distribution of  $\text{Co}_3\text{O}_4$ .

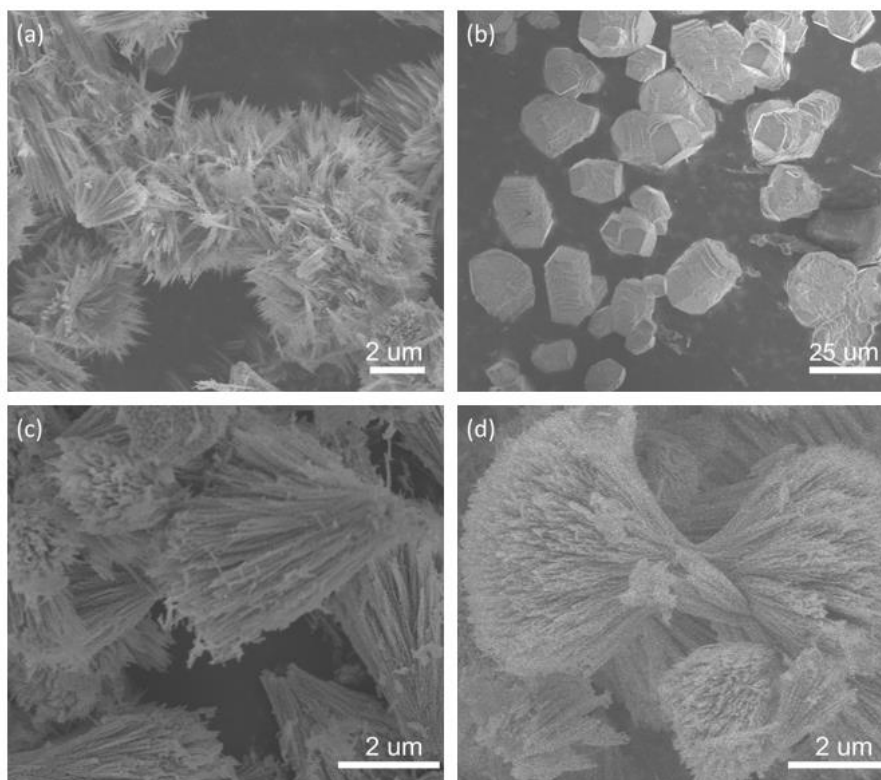

**Fig. S4** SEM images of the  $\text{Co}_3\text{O}_4$  prepared under different hydrothermal conditions: (a) 100 °C and (b) 140 °C for 12 h; 120 °C for (c) 10 and (d) 14 h.

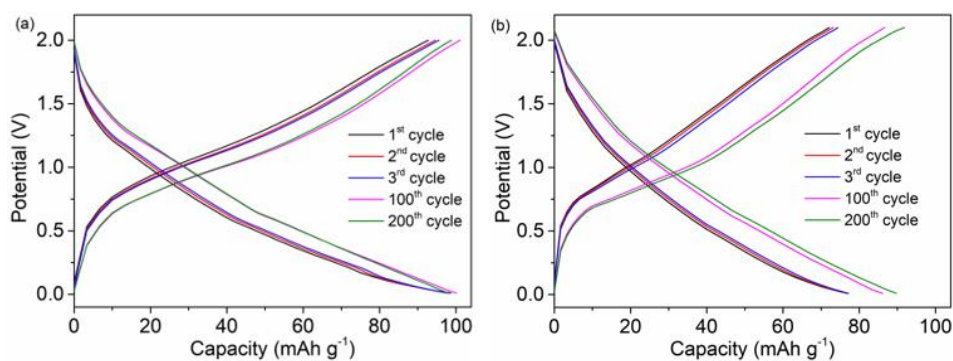

**Fig. S5** (a) Charge-discharge profiles of 3D single-crystalline nanoparticles-chained  $\text{Co}_3\text{O}_4$  charging at  $100 \text{ mA g}^{-1}$  and discharging at  $200 \text{ mA g}^{-1}$ . (b) Charge-discharge profiles of  $\text{Co}_3\text{O}_4$  charging at  $200 \text{ mA g}^{-1}$ , and discharging at  $100 \text{ mA g}^{-1}$ .

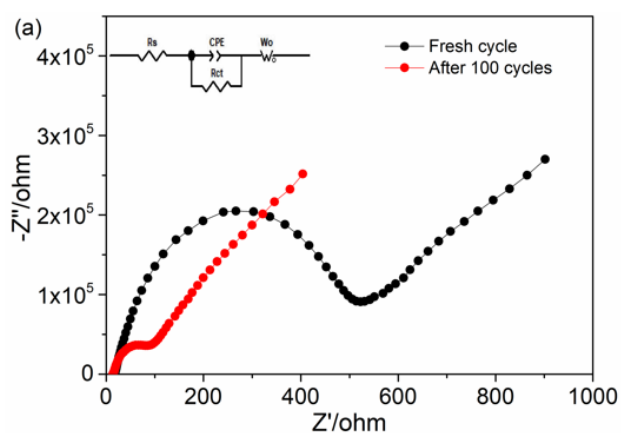

**Fig. S6** EIS spectra of the  $\text{Co}_3\text{O}_4$  cathode before and after cycling at  $100 \text{ mA g}^{-1}$ .

**Table S1.** Comparison on the performance of some nanocomposite-based cathodes.

| Material               | Preparation approach   | Rate ( $\text{mA g}^{-1}$ ) | Cycle number | Capacity ( $\text{mAh g}^{-1}$ ) | Ref. |
|------------------------|------------------------|-----------------------------|--------------|----------------------------------|------|
| F-doped $\text{TiO}_2$ | Hydrothermal synthesis | 20                          | 50           | 63.7                             | 1    |
| $\text{CNT@VS}_4$      | Solvothermal method    | 500                         | 800          | 76.3                             | 2    |

|                                                  |                                |     |      |       |               |
|--------------------------------------------------|--------------------------------|-----|------|-------|---------------|
| MgMn <sub>1.8</sub> Sr <sub>0.2</sub> O          | Self-propagating<br>combustion | 100 | 10   | 59    | 3             |
| CuCo <sub>2</sub> S <sub>4</sub> /CuS@MW<br>CNTs | Hydrothermal<br>synthesis      | 300 | 1000 | 38.7  | 4             |
| MnO <sub>2</sub> /MXene-V <sub>2</sub> C         | Etching method                 | 100 | 100  | 76.7  | 5             |
| Co <sub>3</sub> O <sub>4</sub>                   | Hydrothermal<br>synthesis      | 100 | 200  | 111.7 | This<br>study |

## References

- 1 T. S. Le; T. H. Hoa and D. Q. Truong, *J. Electroanal. Chem.* 2019, **848**, 113293.
- 2 J. B. Li, Y. F. Xu, Y. N. He, Z. Z. Zhang, C. N. Zhu and X. S. Zhou, *J. Phys. Chem. Lett.* 2022, **13**, 5726–5733.
- 3 N. Harudin, Z. Osman, S. R. Majid, L. Othman, D. Hambali and M. M. Silva, *Ionics* 2020, **26**, 3947–3958.
- 4 Q. Zhang, Y. B. Hu, J. Wang and F. S. Pan, *J. Phys. Chem. C* 2021, **125**, 19673–19681.
- 5 Y. Li, R. N. Zhang, D. H. Xu, D. H. Zhang, Y. C. Wei and Y. X. Guo, *Int. J. Electrochem. Sci.* 2020, **15**, 11227–11237.
